# Supplementary material
Source: ML conference proceedings conference paper supplement (https://proceedings.mlr.press/v48/zhaob16.html)
Supplement: Supplementary file 1 [file zhaob16-supp.pdf]

## Supplementary Materials

**Lemma 2** *If there exist all different  $e_1, e_2, \dots, e_{2k} < 1$  and a non-zero vector  $\vec{\beta}^* = [\beta_1^*, \beta_2^*, \dots, \beta_{2k}^*]^\top$ , s.t.*

- $\mathbf{H}^k \vec{\beta}^* = 0$ ,
- $\vec{\beta}^*$  has  $k$  positive elements and  $k$  negative elements.

*then  $k$ -PL for  $2k - 1$  alternatives is not identifiable.*

**Proof:** W.l.o.g. assume  $\beta_1^*, \beta_2^*, \dots, \beta_k^* > 0$  and  $\beta_{k+1}^*, \beta_{k+2}^*, \beta_{2k}^* < 0$ .  $\mathbf{H}_{2k-1}^k \vec{\beta}^* = 0$  means that

$$\sum_{r=1}^k \beta_r^* \vec{f}_r = - \sum_{r=k+1}^{2k} \beta_r^* \vec{f}_r$$

According to the first row in  $\mathbf{H}^k$ , we have  $\sum_r \beta_r^* = 0$ . Let  $S = \sum_{r=1}^k \beta_r^*$ . Further let  $\alpha_r^* = \beta_r^*/S$  when  $r = 1, 2, \dots, k$  and  $\alpha_r^* = -\beta_r^*/S$  when  $r = k+1, k+2, \dots, 2k$ . We have

$$\sum_{r=1}^k \alpha_r^* \vec{f}_r = \sum_{r=k+1}^{2k} \alpha_r^* \vec{f}_r$$

where  $\sum_{r=1}^k \alpha_r^* = 1$  and  $\sum_{r=k+1}^{2k} \alpha_r^* = 1$ . This means that the model is not identifiable. ■

**Lemma 4**  $\sum_s \frac{1}{\prod_{t \neq s} (e_s - e_t)} = 0$  where  $\forall s \neq t, e_s \neq e_t$ .

**Proof:** The partial fraction decomposition of the first term is

$$\frac{1}{\prod_{q \neq 1} (e_1 - e_q)} = \sum_{q \neq 1} \left( \frac{B_q}{e_1 - e_q} \right)$$

where  $B_q = \frac{1}{\prod_{p \neq q, p \neq 1} (e_q - e_p)}$ .

Namely,

$$\frac{1}{\prod_{q \neq 1} (e_1 - e_q)} = - \sum_{q \neq 1} \left( \frac{1}{\prod_{p \neq q} (e_q - e_p)} \right)$$

We have

$$\sum_s \frac{1}{\prod_{t \neq s} (e_s - e_t)} = \frac{1}{\prod_{q \neq 1} (e_1 - e_q)} + \sum_{q \neq 1} \left( \frac{1}{\prod_{p \neq q} (e_q - e_p)} \right) = 0$$

■

**Lemma 5** For all  $\mu \leq \nu - 2$ , we have  $\sum_{s=1}^{\nu} \frac{(e_s)^\mu}{\prod_{t \neq s} (e_s - e_t)} = 0$ .

**Proof:** Base case: When  $\nu = 2, \mu = 0$ , obviously

$$\frac{1}{e_1 - e_2} + \frac{1}{e_2 - e_1} = 0$$

Assume the lemma holds for  $\nu = p$  and all  $\mu \leq \nu - 2$ , that is  $\sum_{s=1}^{\nu} \frac{e_s^{\mu}}{\prod_{t \neq s} (e_s - e_t)} = 0$ .  
When  $\nu = p + 1, \mu = 0$ , by Lemma 4 we have

$$\sum_{s=1}^{p+1} \frac{1}{\prod_{t \neq s} (e_s - e_t)} = 0$$

Assume  $\sum_{s=1}^{p+1} \frac{e_s^q}{\prod_{t \neq s} (e_s - e_t)} = 0$  for all  $\mu = q, q \leq p - 2$ . For  $\mu = q + 1$ ,

$$\begin{aligned} \sum_{s=1}^{p+1} \frac{e_s^{q+1}}{\prod_{t \neq s} (e_s - e_t)} &= \sum_{s=1}^{p+1} \frac{e_s^q e_{p+1}}{\prod_{t \neq s} (e_s - e_t)} + \sum_{s=1}^{p+1} \frac{e_s^q (e_s - e_{p+1})}{\prod_{t \neq s} (e_s - e_t)} \\ &= e_{p+1} \sum_{s=1}^{p+1} \frac{e_s^q}{\prod_{t \neq s} (e_s - e_t)} + \sum_{s=1}^p \frac{e_s^q}{\prod_{t \neq s} (e_s - e_t)} = 0 \end{aligned}$$

The last equality is obtained from the induction hypotheses. ■

**Lemma 6** Let  $f(x)$  be any polynomial of degree  $\nu - 2$ , then  $\sum_{s=1}^{\nu} \frac{f(e_s)}{\prod_{t \neq s} (e_s - e_t)} = 0$ .

This can be easily derived from Lemma 5.

**Remaining proof for Theorem 1**

Now we are ready to prove that  $\mathbf{H}^k \vec{\beta}^* = 0$ . Note that the degree of the numerator of  $\beta_r^*$  is  $2k - 3$  (see Equation (3)). Let  $[\mathbf{H}^k]_i$  denote the  $i$ -th row of  $\mathbf{H}^k$ . We have the following calculations.

$$\begin{aligned} [\mathbf{H}^k]_1 \vec{\beta}^* &= \sum_{r=1}^{2k} \frac{\prod_{p=1}^{2k-3} (pe_r + 2k - 2 - p)}{\prod_{q \neq r} (e_r - e_q)} = 0 \\ [\mathbf{H}^k]_2 \vec{\beta}^* &= \sum_{r=1}^{2k} \frac{\prod_{p=1}^{2k-3} e_r (pe_r + 2k - 2 - p)}{\prod_{q \neq r} (e_r - e_q)} = 0 \end{aligned}$$

For any  $2 < i \leq 2k - 1$ , we have

$$\begin{aligned} &[\mathbf{H}^k]_i \vec{\beta}^* \\ &= \sum_{r=1}^{2k} \frac{e_r (1 - e_r)^{i-2} \prod_{p=1}^{2k-3} (pe_r + 2k - 2 - p)}{\prod_{p=1}^{i-2} (pe_r + 2k - 2 - p) \prod_{q \neq r} (e_r - e_q)} \\ &= \sum_{r=1}^{2k} \frac{e_r (1 - e_r)^{i-2} \prod_{p=i-1}^{2k-3} (pe_r + 2k - 2 - p)}{\prod_{q \neq r} (e_r - e_q)} = 0 \end{aligned}$$

The last equality is obtained by letting  $\nu = 2k - 2$  in Lemma 6. Therefore,  $\mathbf{H}^k \vec{\beta}^* = 0$ . Note that  $\vec{\beta}^*$  is also the solution for less than  $2k - 1$  alternatives. The theorem follows after applying Lemma 2.

**Theorem 2** For  $k = 2$ , and any  $m \geq 4$ , the 2-PL is identifiable.

**Proof:** We will apply Lemma 1 to prove the theorem. That is, we will show that for all non-degenerate  $\vec{\theta}^{(1)}, \vec{\theta}^{(2)}, \vec{\theta}^{(3)}, \vec{\theta}^{(4)}$  such that  $\text{rank}(\mathbf{F}_4^2) = 4$ . We recall that  $\mathbf{F}_4^2$  is a  $24 \times 4$  matrix. Instead of proving  $\text{rank}(\mathbf{F}_4^2) = 4$  directly, we will first obtain a  $4 \times 4$  matrix  $\mathbf{F}^* = T \times \mathbf{F}_4^2$  by linearly combining some row vectors of  $\mathbf{F}_4^2$  via a  $4 \times 24$  matrix  $T$ . Then, we show that  $\text{rank}(\mathbf{F}^*) = 4$ , which implies that  $\text{rank}(\mathbf{F}_4^2) = 4$ .

For simplicity we use  $[e_r, b_r, c_r, d_r]^\top$  to denote the parameter of  $r$ th Plackett-Luce component for  $a_1, a_2, a_3, a_4$  respectively. Namely,

$$\begin{bmatrix} \vec{\theta}^{(1)} & \vec{\theta}^{(2)} & \vec{\theta}^{(3)} & \vec{\theta}^{(4)} \end{bmatrix} = \begin{bmatrix} e_1 & e_2 & e_3 & e_4 \\ b_1 & b_2 & b_3 & b_4 \\ c_1 & c_2 & c_3 & c_4 \\ d_1 & d_2 & d_3 & d_4 \end{bmatrix}$$

where for each  $r \leq 4$ ,  $\vec{\omega}^{(r)}$  is a row vector. We further let  $\vec{1} = [1, 1, 1, 1]$ . For proof convenience we define 5 row vectors.

$$\begin{aligned} \vec{1} &= [1, 1, 1, 1] \\ \vec{\omega}^{(1)} &= [e_1, e_2, e_3, e_4] \\ \vec{\omega}^{(2)} &= [b_1, b_2, b_3, d_3] \\ \vec{\omega}^{(3)} &= [c_1, c_2, c_3, c_4] \\ \vec{\omega}^{(4)} &= [d_1, d_2, d_3, d_4] \end{aligned}$$

Clearly we have  $\sum_{i=1}^4 \vec{\omega}^{(i)} = \vec{1}$ . Therefore, if there exist three  $\vec{\omega}$ 's, for example  $\{\vec{\omega}^{(1)}, \vec{\omega}^{(2)}, \vec{\omega}^{(3)}\}$ , such that  $\{\vec{\omega}^{(1)}, \vec{\omega}^{(2)}, \vec{\omega}^{(3)}\}$  and  $\vec{1}$  are linearly independent, then  $\text{rank}(\mathbf{F}_4^2) = 4$  because each  $\vec{\omega}^{(i)}$  corresponds to the probability of  $a_i$  being ranked at the top, which means that  $\vec{\omega}^{(i)}$  is a linear combination of rows in  $\mathbf{F}_4^2$ . Because  $\vec{\theta}^{(1)}, \vec{\theta}^{(2)}, \vec{\theta}^{(3)}, \vec{\theta}^{(4)}$  is non-degenerate, at least one of  $\{\vec{\omega}^{(1)}, \vec{\omega}^{(2)}, \vec{\omega}^{(3)}, \vec{\omega}^{(4)}\}$  is linearly independent of  $\vec{1}$ . W.l.o.g. suppose  $\vec{\omega}^{(1)}$  is linearly independent of  $\vec{1}$ . This means that not all of  $e_1, e_2, e_3, e_4$  are equal. The theorem will be proved in the following two cases.

**Case 1.**  $\vec{\omega}^{(2)}, \vec{\omega}^{(3)}$ , and  $\vec{\omega}^{(4)}$  are all linear combinations of  $\vec{1}$  and  $\vec{\omega}^{(1)}$ .

**Case 2.** There exists a  $\vec{\omega}^{(i)}$  (where  $i \in \{2, 3, 4\}$ ) that is linearly independent of  $\vec{1}$  and  $\vec{\omega}^{(1)}$ .

**Case 1.** For all  $i = 2, 3, 4$  we can rewrite  $\vec{\omega}^{(i)} = p_i \vec{\omega}^{(1)} + q_i$  for some constants  $p_i, q_i$ . More precisely, for all  $r = 1, 2, 3, 4$  we have:

$$b_r = p_2 e_r + q_2 \tag{5}$$

$$c_r = p_3 e_r + q_3 \tag{6}$$

$$d_r = p_4 e_r + q_4 \tag{7}$$

Because  $\vec{\omega}^{(1)} + \vec{\omega}^{(2)} + \vec{\omega}^{(3)} + \vec{\omega}^{(4)} = \vec{1}$ , we have

$$p_2 + p_3 + p_4 = -1 \tag{8}$$

$$q_2 + q_3 + q_4 = 1 \tag{9}$$

In this case for each  $r \leq 4$ , the  $r$ -th column of  $\mathbf{F}_4^2$ , which is  $f_4(\vec{\theta}^{(r)})$ , is a function of  $e_r$ . Because the  $\vec{\theta}$ 's are non-degenerate,  $e_1, e_2, e_3, e_4$  must be pairwise different.

We assume  $p_2 \neq 0$  and  $q_2 \neq 1$  for all subcases of **Case 1** (This will be denoted as **Case 1 Assumption**). The following claim shows that there exists  $p_i, q_i$  where  $i \in \{2, 3, 4\}$  satisfying this condition. If  $i \neq 2$  we can switch the row of alternatives  $a_2$  and  $a_i$ . Then the assumption holds.

**Claim 2** *There exists  $i \in 2, 3, 4$  which satisfy the following conditions:*

- $q_i \neq 1$
- $p_i \neq 0$

**Proof:** Suppose for all  $i = 2, 3, 4$ ,  $q_i = 1$  or  $p_i = 0$ .

If  $p_i = 0$ ,  $q_i$  must be positive because  $b_r, c_r, d_r$  are all positive. If  $p_i \neq 0$ , Then  $q_i = 1$  due to the assumption above. So  $q_i > 0$  for all  $i = 2, 3, 4$ . If there exists  $i$  s.t.  $q_i = 1$ , then (9) does not hold. So for all  $i$ ,  $q_i \neq 1$ . Then  $p_i = 0$  holds for all  $i \in \{2, 3, 4\}$ , which violates (8). ■

**Case 1.1.**  $p_2 + q_2 \neq 0$  and  $p_2 + q_2 \neq 1$ .

For this case we first define a  $4 \times 4$  matrix  $\hat{\mathbf{F}}$  as follows.

| $\hat{\mathbf{F}}$                                                                                                                                                                                                                                                       | Moments                                                                                                              |
|--------------------------------------------------------------------------------------------------------------------------------------------------------------------------------------------------------------------------------------------------------------------------|----------------------------------------------------------------------------------------------------------------------|
| $\begin{bmatrix} 1 & 1 & 1 & 1 \\ e_1 & e_2 & e_3 & e_4 \\ \frac{e_1 b_1}{1-b_1} & \frac{e_2 b_2}{1-b_2} & \frac{e_3 b_3}{1-b_3} & \frac{e_4 b_4}{1-b_4} \\ \frac{e_1 b_1}{1-e_1} & \frac{e_2 b_2}{1-e_2} & \frac{e_3 b_3}{1-e_3} & \frac{e_4 b_4}{1-e_4} \end{bmatrix}$ | $\vec{1}$<br>$a_1 \succ \text{others}$<br>$a_2 \succ a_1 \succ \text{others}$<br>$a_1 \succ a_2 \succ \text{others}$ |

We use  $\vec{1}$  and  $\vec{\omega}^{(1)}$  as the first two rows.  $\vec{\omega}^{(1)}$  corresponds to the probability that  $a_1$  is ranked in the top. We call such a probability a *moment*. Each moment is the sum of probabilities of some rankings. For example, the “ $a_1 \succ \text{others}$ ” moment is the total probability for  $\{V \in \mathcal{L}(\mathcal{A}) : a_1 \text{ is ranked at the top of } V\}$ . It follows that there exists a  $4 \times 24$  matrix  $\hat{T}$  such that  $\hat{\mathbf{F}} = \hat{T} \times \mathbf{F}_4^2$ .

Define

$$\begin{aligned} \vec{\theta}^{(b)} &= \left[ \frac{1}{1-b_1}, \frac{1}{1-b_2}, \frac{1}{1-b_3}, \frac{1}{1-b_4} \right] \\ &= \left[ \frac{1}{1-p_2 e_1 - q_2}, \frac{1}{1-p_2 e_2 - q_2}, \frac{1}{1-p_2 e_3 - q_2}, \frac{1}{1-p_2 e_4 - q_2} \right] \end{aligned}$$

and

$$\vec{\theta}^{(e)} = \left[ \frac{1}{1-e_1}, \frac{1}{1-e_2}, \frac{1}{1-e_3}, \frac{1}{1-e_4} \right] \quad (10)$$

And define  $\mathbf{F}^* = \begin{bmatrix} \vec{1} \\ \vec{\omega}^{(1)} \\ \vec{\theta}^{(b)} \\ \vec{\theta}^{(e)} \end{bmatrix}$ . It can be verified that  $\hat{\mathbf{F}} = T^* \times \mathbf{F}^*$ , where

$$T^* = \begin{bmatrix} 1 & 0 & 0 & 0 \\ 0 & 1 & 0 & 0 \\ -\frac{1}{p_2} & -1 & \frac{1-q_2}{p_2} & 0 \\ -(p_2 + q_2) & -p_2 & 0 & p_2 + q_2 \end{bmatrix}$$

Because **Case 1.1** assumes that  $p_2 + q_2 \neq 0$  and by Case 1 Assumption  $p_2 \neq 0$ ,  $q_2 \neq 1$ , we have that  $T^*$  is invertible. Therefore,  $\mathbf{F}^* = (T^*)^{-1} \times \hat{\mathbf{F}}$ , which means that  $\mathbf{F}^* = T \times \mathbf{F}_4^2$  for some  $4 \times 24$  matrix  $T$ .

We now prove that  $\text{rank}(\mathbf{F}^*) = 4$ . For the sake of contradiction, suppose that  $\text{rank}(\mathbf{F}^*) < 4$ . It follows that there exist a nonzero row vector  $\vec{t} = [t_1, t_2, t_3, t_4]$ , such that  $\vec{t}\mathbf{F}^* = 0$ . This means that for all  $r \leq 4$ ,

$$t_1 + t_2 e_r + \frac{t_3}{1 - p_2 e_r - q_2} + \frac{t_4}{1 - e_r} = 0$$

Let

$$f(x) = t_1 + t_2 x + \frac{t_3}{1 - p_2 x - q_2} + \frac{t_4}{1 - x}$$

Let  $g(x) = (1 - p_2 x - q_2)(1 - x)f(x)$ . We recall that  $e_1, e_2, e_3, e_4$  are four roots of  $f(x)$ , which means that they are also the four roots of  $g(x)$ . Now we will verify that not all coefficients of  $f(x)$  are zero. Suppose all coefficients of  $x$  in  $f(x)$  are zero, then  $g(x) = 0$  holds for all  $x$ . By assigning  $x$  to different values, we have

$$\begin{aligned} g(1) &= t_4(1 - p_2 - q_2) = 0 \\ g\left(\frac{1 - q_2}{p_2}\right) &= \frac{t_3(p_2 + q_2 - 1)}{p_2} = 0 \end{aligned}$$

By Case 1.1 assumption  $p_2 + q_2 \neq 1$ , we have  $t_3 = t_4 = 0$ . Then from  $f(x) = t_1 + t_2 x = 0$  holds for all  $x$ , we have  $t_1 = t_2 = 0$ , which is a contradiction.

We note that the degree of  $g(x)$  is 3. Therefore, due to the Fundamental Theorem of Algebra,  $g(x)$  has at most three different roots. This means that  $e_1, e_2, e_3, e_4$  are not pairwise different, which is a contradiction. Therefore,  $\text{rank}(\mathbf{F}^*) = 4$ , which means that  $\text{rank}(\mathbf{F}_4^2) = 4$ .

**Case 1.2.**  $p_2 + q_2 = 1$ .

If we can find an alternative  $a_i$ , such that  $p_i$  and  $q_i$  satisfy the following conditions:

- $p_i \neq 0$
- $q_i \neq 1$
- $p_i + q_i \neq 0$
- $p_i + q_i \neq 1$

Then we can use  $a_i$  as  $a_2$ , which belongs to **Case 1.1**. Otherwise we have the following claim.

**Claim 3** *If for  $i \in \{3, 4\}$ ,  $p_i$  and  $q_i$  satisfy one of the following conditions*

1.  $p_i = 0$
2.  $p_i \neq 0, q_i = 1$
3.  $p_i + q_i = 0$
4.  $p_i + q_i = 1$

*We claim that there exists  $i \in \{3, 4\}$  s.t.  $p_i, q_i$  satisfy condition 2, namely  $p_i \neq 0, q_i = 1$ .*

**Proof:** Suppose  $p_i = 0$ , then  $q_i > 0$  because  $p_i e_1 + q_i$  is a parameter in a Plackett-Luce component. If for  $i = 3, 4$ ,  $p_i$  and  $q_i$  satisfy any of conditions 1, 3 or 4, then  $q_i \geq -p_i$  ( $q_i > 0$  for condition 1,  $q_i = -p_i$  for condition 3,  $q_i = 1 - p_i > -p_1$  for condition 4). As  $\sum_{i=2}^4 p_i = -1, \sum_{i=2}^4 q_i \geq 1 - \sum_{i=2}^4 p_i = 2$ , which contradicts that  $\sum_{i=2}^4 q_i = 1$ . ■

Without loss of generality we let  $p_3 \neq 0$  and  $q_3 = 1$ . We now construct  $\hat{\mathbf{F}}$  as is shown in the following table.

| $\hat{\mathbf{F}}$                                                                                                                                                                                                                                                       |  |  |  | Moments                             |
|--------------------------------------------------------------------------------------------------------------------------------------------------------------------------------------------------------------------------------------------------------------------------|--|--|--|-------------------------------------|
| $\begin{bmatrix} 1 & 1 & 1 & 1 \\ e_1 & e_2 & e_3 & e_4 \\ \frac{e_1 b_1}{1-e_1} & \frac{e_2 b_2}{1-e_2} & \frac{e_3 b_3}{1-e_3} & \frac{e_4 b_4}{1-e_4} \\ \frac{c_1 b_1}{1-c_1} & \frac{c_2 b_2}{1-c_2} & \frac{c_3 b_3}{1-c_3} & \frac{c_4 b_4}{1-c_4} \end{bmatrix}$ |  |  |  | $\vec{1}$                           |
|                                                                                                                                                                                                                                                                          |  |  |  | $a_1 \succ \text{others}$           |
|                                                                                                                                                                                                                                                                          |  |  |  | $a_1 \succ a_2 \succ \text{others}$ |
|                                                                                                                                                                                                                                                                          |  |  |  | $a_3 \succ a_2 \succ \text{others}$ |

We define  $\vec{\theta}^{(b)}$  the same way as in **Case 1.1**, and define

$$\vec{\theta}^{(c)} = \left[ \frac{1}{e_1}, \frac{1}{e_2}, \frac{1}{e_3}, \frac{1}{e_4} \right]$$

Define

$$\mathbf{F}^* = \begin{bmatrix} \vec{1} \\ \vec{\omega}^{(1)} \\ \vec{\theta}^{(e)} \\ \vec{\theta}^{(c)} \end{bmatrix}$$

We will show that  $\hat{\mathbf{F}} = T^* \times \mathbf{F}^*$  where  $T^*$  has full rank.

For all  $r = 1, 2, 3, 4$

$$\frac{c_r b_r}{1 - c_r} = \frac{(p_3 e_r + q_3)(p_2 e_r + q_2)}{1 - p_3 e_r - q_3} = \frac{(p_3 e_r + 1)(p_2 e_r + 1 - p_2)}{-p_3 e_r} = -p_2 e_r + (p_2 - 1 - \frac{p_2}{p_3}) - \frac{1 - p_2}{p_3 e_r}$$

So

$$\hat{\mathbf{F}} = \begin{bmatrix} \vec{1} \\ \vec{\omega}^{(1)} \\ -\vec{1} - p_2\vec{\omega}^{(1)} + \vec{\theta}^{(e)} \\ (p_2 - 1 - \frac{p_2}{p_3})\vec{1} - p_2\vec{\omega}^{(1)} - \frac{1-p_2}{p_3}\vec{\theta}^{(c)} \end{bmatrix}$$

Suppose  $p_2 \neq 1$ , we have  $\hat{\mathbf{F}} = T^* \times \mathbf{F}^*$  where

$$T^* = \begin{bmatrix} 1 & 0 & 0 & 0 \\ 0 & 1 & 0 & 0 \\ -1 & -p_2 & 1 & 0 \\ p_2 - 1 - \frac{p_2}{p_3} & -p_2 & 0 & -\frac{1-p_2}{p_3} \end{bmatrix}$$

which is full rank. So  $\text{rank}(\mathbf{F}^*) = \text{rank}(\hat{\mathbf{F}})$ .

If  $\text{rank}(\mathbf{F}_4^2) \leq 3$ , then there is at least one column in  $\mathbf{F}_4^2$  dependent of the other columns. As all rows in  $\hat{\mathbf{F}}$  are linear combinations of rows in  $\mathbf{F}_4^2$ , there is also at least one column in  $\hat{\mathbf{F}}$  dependent of the other columns. Therefore we have  $\text{rank}(\hat{\mathbf{F}}) \leq 3$ . Further we have  $\text{rank}(\mathbf{F}^*) \leq 3$ . Therefore, there exists a nonzero row vector  $\vec{t} = [t_1, t_2, t_3, t_4]$ , s.t.

$$\vec{t}\mathbf{F}^* = 0$$

Namely, for all  $r \leq 4$ ,

$$t_1 + t_2 e_r + \frac{t_3}{1 - e_r} + \frac{t_4}{e_r} = 0$$

Let

$$f(x) = t_1 + t_2 x + \frac{t_3}{1 - x} + \frac{t_4}{x} = 0$$

$$g(x) = x(1 - x)f(x) = x(1 - x)(t_1 + t_2) + t_3 x + t_4(1 - x)$$

If any of the coefficients in  $f(x)$  is nonzero, then  $g(x)$  is a polynomial of degree at most 3. There will be a maximum of 3 different roots. Since this equation holds for  $e_r$  where  $r = 1, 2, 3, 4$ , there exists  $s \neq t$  s.t.  $e_s = e_t$ . Otherwise  $g(x) = f(x) = 0$  for all  $x$ . We have

$$g(0) = t_4 = 0$$

$$g(1) = t_3 = 0$$

Substitute  $t_3 = t_4 = 0$  into  $f(x)$ , we have  $f(x) = t_1 + t_2 x = 0$  for all  $x$ . So  $t_1 = t_2 = 0$ . This contradicts the nonzero requirement of  $\vec{t}$ . Therefore there exists  $s \neq t$  s.t.  $e_s = e_t$ . From (5)(6)(7) we have  $\vec{\theta}^{(s)} = \vec{\theta}^{(t)}$ , which is a contradiction.

If  $p_2 = 1$ , from the assumption of **Case 1.2**  $q_2 = 0$ . So  $b_r = e_r$  for  $r = 1, 2, 3, 4$ . Then from (8) we have  $p_4 = -p_3 - 2$  and from (9) we have  $q_4 = 0$ . Since  $p_4$  and  $q_4$  satisfy one of the four conditions in Claim 3, we can show it must satisfy Condition 4. ( $q_4 = 0$  violates Condition 2. If it satisfies Condition 1 or 3, then  $p_4 = 0$ . Then  $d_r = p_4 a_r + q_4 = 0$ , which is impossible.) So  $p_4 = 1$ , and  $p_3 = -3$ . This is the case where  $\vec{\omega}^{(1)} = \vec{\omega}^{(2)} = \vec{\omega}^{(4)}$  and  $\vec{\omega}^{(3)} = 1 - 3\vec{\omega}^{(1)}$ . For this case, we use  $a_3$  as  $a_1$ . After

the transformation, we have  $\vec{\omega}^{(2)} = \vec{\omega}^{(3)} = \vec{\omega}^{(4)} = \frac{1-\vec{\omega}^{(1)}}{3}$ . We claim that this lemma holds for a more general case where  $p_i + q_i = 0$  for  $i = 2, 3, 4$ . It is easy to check that  $p_i = -\frac{1}{3}$  and  $q_i = \frac{1}{3}$  belongs to this case.

**Claim 4** For all  $r = 1, 2, 3, 4$ , if

$$\vec{\theta}^{(r)} = \begin{bmatrix} e_r \\ b_r \\ c_r \\ d_r \end{bmatrix} = \begin{bmatrix} e_r \\ p_2 e_r - p_2 \\ p_3 e_r - p_3 \\ -(1 + p_2 + p_3)e_r + (1 + p_2 + p_3) \end{bmatrix} \quad (11)$$

The model is identifiable.

**Proof:** We first show a claim, which is useful to the proof.

**Claim 5** Under the settings of (11),  $-1 < p_2, p_3 < 0$ ,  $-1 < p_2 + p_3 < 0$ .

**Proof:** From the definition of Plackett-Luce model,  $0 < e_r, b_r, c_r, d_r < 1$ . From (11), we have  $p_2 = \frac{b_r}{e_r - 1}$ . Since  $b_r > 0$  and  $e_r < 1$ ,  $p_2 < 0$ . Similarly we have  $p_3 < 0$  and  $-(1 + p_2 + p_3) < 0$ . So  $-1 < p_2 + p_3 < 0$ . Then we have  $p_2 > -1 - p_3$ . So  $-1 - p_3 < p_2 < 0$ ,  $p_3 > -1$ . Similarly we have  $p_2 > -1$ . ■

In this case, we construct  $\hat{\mathbf{F}}$  in the following way.

| $\hat{\mathbf{F}}$                   |                                      |                                      |                                      | Moments                             |
|--------------------------------------|--------------------------------------|--------------------------------------|--------------------------------------|-------------------------------------|
| 1                                    | 1                                    | 1                                    | 1                                    | $\vec{1}$                           |
| $\frac{e_1}{1-b_1}$                  | $\frac{e_2}{1-b_2}$                  | $\frac{e_3}{1-b_3}$                  | $\frac{e_4}{1-b_4}$                  | $a_1 \succ \text{others}$           |
| $\frac{e_1 b_1}{(1-b_1)(1-b_1-c_1)}$ | $\frac{e_2 b_2}{(1-b_2)(1-b_2-c_2)}$ | $\frac{e_3 b_3}{(1-b_3)(1-b_3-c_3)}$ | $\frac{e_4 b_4}{(1-b_4)(1-b_4-c_4)}$ | $a_2 \succ a_1 \succ \text{others}$ |
|                                      |                                      |                                      |                                      | $a_2 \succ a_3 \succ a_1 \succ a_4$ |

Define  $\vec{\theta}^{(b)}$  the same way as in **Case 1.1**

$$\begin{aligned} \vec{\theta}^{(b)} &= \left[ \frac{1}{1-b_1}, \frac{1}{1-b_2}, \frac{1}{1-b_3}, \frac{1}{1-b_4} \right] \\ &= \left[ \frac{1}{1-p_2 e_1 + p_2}, \frac{1}{1-p_2 e_2 + p_2}, \frac{1}{1-p_2 e_3 + p_2}, \frac{1}{1-p_2 e_4 + p_2} \right] \end{aligned}$$

And define

$$\vec{\theta}^{(bc)} = \left[ \frac{1}{1-(p_2+p_3)e_1+p_2+p_3}, \frac{1}{1-(p_2+p_3)e_2+p_2+p_3}, \frac{1}{1-(p_2+p_3)e_3+p_2+p_3}, \frac{1}{1-(p_2+p_3)e_4+p_2+p_3} \right]$$

Further define

$$\mathbf{F}^* = \begin{bmatrix} \vec{1} \\ \vec{\omega}^{(1)} \\ \vec{\theta}^{(b)} \\ \vec{\theta}^{(bc)} \end{bmatrix}$$



We will show  $\hat{\mathbf{F}} = T^* \times \mathbf{F}^*$  where  $T^*$  has full rank.

The last two rows of  $\hat{\mathbf{F}}$

$$\begin{aligned} \frac{e_r b_r}{1 - b_r} &= -e_r - \frac{1}{p_2} + \frac{1 + p_2}{p_2(1 - p_2 e_r + p_2)} \\ \frac{e_r b_r c_r}{(1 - b_r)(1 - b_r - c_r)} &= \frac{e_r(p_2 e_r - p_2)(p_3 e_r - p_3)}{(1 - p_2 e_r + p_2)(1 - (p_2 + p_3)e_r + p_2 + p_3)} \\ &= \frac{p_2 p_3 e_r (e_r - 1)^2}{(1 - p_2 e_r + p_2)(1 - (p_2 + p_3)e_r + p_2 + p_3)} \\ &= \frac{p_3(2p_2 + p_3)}{p_2(p_2 + p_3)^2} + \frac{p_3}{p_2 + p_3} e_r - \frac{(1 + p_2)}{p_2(1 - p_2 e_r + p_2)} \\ &\quad + \frac{p_2(1 + p_2 + p_3)}{(1 - (p_2 + p_3)e_r + p_2 + p_3)(p_2 + p_3)^2} \end{aligned}$$

So

$$\hat{\mathbf{F}} = \begin{bmatrix} \vec{1} \\ \vec{\omega}^{(1)} \\ -\frac{1}{p_2} \vec{1} - \vec{\omega}^{(1)} + \frac{1+p_2}{p_2} \vec{\theta}^{(b)} \\ \frac{p_3(2p_2+p_3)}{p_2(p_2+p_3)^2} \vec{1} + \frac{p_3}{p_2+p_3} \vec{\omega}^{(1)} - \frac{1+p_2}{p_2} \vec{\theta}^{(b)} + \frac{p_2(1+p_2+p_3)}{(p_2+p_3)^2} \vec{\theta}^{(bc)} \end{bmatrix}$$

Then we have  $\hat{\mathbf{F}} = T^* \times \mathbf{F}^*$  where

$$T^* = \begin{bmatrix} 1 & 0 & 0 & 0 \\ 0 & 1 & 0 & 0 \\ -\frac{1}{p_2} & -1 & \frac{1+p_2}{p_2} & 0 \\ \frac{p_3(2p_2+p_3)}{p_2(p_2+p_3)^2} & \frac{p_3}{p_2+p_3} & -\frac{1+p_2}{p_2} & \frac{p_2(1+p_2+p_3)}{(p_2+p_3)^2} \end{bmatrix}$$

From Claim 5, we have  $-1 < p_2 < 0$  and  $-1 < p_2 + p_3 < 0$ , so  $\frac{1+p_2}{p_2} \neq 0$  and  $\frac{p_2(1+p_2+p_3)}{(p_2+p_3)^2} \neq 0$ . So  $T$  has full rank. Then  $\text{rank}(\mathbf{F}^*) = \text{rank}(\hat{\mathbf{F}})$ .

If  $\text{rank}(\mathbf{F}_4^2) \leq 3$ , then there is at least one column in  $\mathbf{F}_4^2$  dependent of other columns. As all rows in  $\hat{\mathbf{F}}$  are linear combinations of rows in  $\mathbf{F}_4^2$ ,  $\text{rank}(\hat{\mathbf{F}}) \leq 3$ . Since  $\text{rank}(\mathbf{F}^*) = \text{rank}(\hat{\mathbf{F}})$ , we have  $\text{rank}(\mathbf{F}^*) \leq 3$ . Therefore, there exists a nonzero row vector  $\vec{t} = [t_1, t_2, t_3, t_4]$ , s.t.

$$\vec{t} \mathbf{F}^* = 0$$

Namely, for all  $r \leq 4$ ,

$$t_1 + t_2 e_r + \frac{t_3}{1 - p_2 a_r + p_2} + \frac{t_4}{1 - (p_2 + p_3) e_r + p_2 + p_3} = 0$$

Let

$$\begin{aligned} f(x) &= t_1 + t_2 x + \frac{t_3}{1 - p_2 x + p_2} + \frac{t_4}{1 - (p_2 + p_3)x + p_2 + p_3} \\ g(x) &= (1 - p_2 x + p_2)(1 - (p_2 + p_3)x + p_2 + p_3)(t_1 + t_2 x) \\ &\quad + t_3(1 - (p_2 + p_3)x + p_2 + p_3) + t_4(1 - p_2 x + p_2) \end{aligned}$$

If any of the coefficients of  $g(x)$  is nonzero, then  $g(x)$  is a polynomial of degree at most 3. There will be a maximum of 3 different roots. As the equation holds for all  $e_r$  where  $r = 1, 2, 3, 4$ . There exists  $s \neq t$  s.t.  $e_s = e_t$ . Otherwise  $g(x) = f(x) = 0$  for all  $x$ . We have

$$g\left(\frac{1+p_2}{p_2}\right) = \frac{-t_3 p_3}{p_2} = 0$$

$$g\left(\frac{1+p_2+p_3}{p_2+p_3}\right) = \frac{t_4 p_3}{p_2+p_3} = 0$$

From Claim 5 we know  $p_2, p_3 < 0$  and  $p_2 + p_3 < 0$ . So  $t_3 = t_4 = 0$ . Substitute it into  $f(x)$  we have  $f(x) = t_1 + t_2 x = 0$  for all  $x$ . So  $t_1 = t_2 = 0$ . This contradicts the nonzero requirement of  $\vec{t}$ . Therefore there exists  $s \neq t$  s.t.  $e_s = e_t$ . According to (5)(6)(7) we have  $\vec{\theta}^{(s)} = \vec{\theta}^{(t)}$ , which is a contradiction. ■

**Case 1.3.**  $p_2 + q_2 = 0$ .

If there exists  $i$  such that  $p_i + q_i = 1$ , then we can use  $a_i$  as  $a_2$  and the proof is done in **Case 1.2**. It may still be possible to find another  $i$  such that  $p_i, q_i$  satisfy the following two conditions:

1.  $p_i \neq 0$  and  $q_i \neq 1$ ;
2.  $p_i + q_i \neq 0$ .

If we can find another  $i$  to satisfy the two conditions, then the proof is done in **Case 1.1**. Then we can proceed by assuming that the two conditions are not satisfied by any  $i$ . We will prove that the only possibility is  $p_i + q_i = 0$  for  $i = 2, 3, 4$ .

Suppose for  $i = 3, 4$ ,  $p_i$  and  $q_i$  violate Condition 1. If  $p_i = 0$ , then  $q_i > 0$ . If at least one of them has  $q_i = 1$ , then  $e_r + b_r + c_r + d_r > 1$ , which is impossible. If both alternatives violates Condition 1 and  $p_3 = p_4 = 0$ , then  $0 < q_3, q_4 < 1$ . According to (8)  $p_2 = -1$ . As  $p_2 + q_2 = 0$ , we have  $q_2 = 1$ . From (9),  $q_3 + q_4 = 2$ , which is impossible. So there exists  $i \in \{3, 4\}$  such that  $p_i + q_i = 0$ . Then from  $\sum_i \theta_i^r = 1$  we obtain the only case we left out, which is

$$\begin{aligned} e_r & \\ b_r &= p_2 e_r - p_2 \\ c_r &= p_3 e_r - p_3 \\ d_r &= -(1 + p_2 + p_3) e_r + (1 + p_2 + p_3) \end{aligned}$$

This case has been proved in Claim 4.

**Case 2:** There exists  $\vec{\omega}^{(i)}$  that is linearly independent of  $\vec{1}$  and  $\vec{\omega}^{(1)}$ . W.l.o.g. let it be  $\vec{\omega}^{(2)}$ . Define matrix

$$\mathbf{G} = \begin{bmatrix} \vec{1} \\ \vec{\omega}^{(1)} \\ \vec{\omega}^{(2)} \end{bmatrix} = \begin{bmatrix} 1 & 1 & 1 & 1 \\ e_1 & e_2 & e_3 & e_4 \\ b_1 & b_2 & b_3 & b_4 \end{bmatrix}$$

The rank of  $\mathbf{G}$  is 3. Since  $\mathbf{G}$  is constructed using linear combinations of rows in  $\mathbf{F}_4^2$ , the rank of  $\mathbf{F}_4^2$  is at least 3.

If  $\vec{\omega}^{(3)}$  or  $\vec{\omega}^{(4)}$  is independent of rows in  $\mathbf{G}$ , then we can append it to  $\mathbf{G}$  as the fourth row so that the rank of the new matrix is 4. Then  $\mathbf{F}_4^2$  is full rank. So we only need to consider the case where  $\vec{\omega}^{(3)}$  and  $\vec{\omega}^{(4)}$  are linearly dependent of  $\vec{\mathbf{1}}$ ,  $\vec{\omega}^{(1)}$ , and  $\vec{\omega}^{(2)}$ . Let

$$\vec{\omega}^{(3)} = x_3\vec{\omega}^{(1)} + y_3\vec{\omega}^{(2)} + z_3\vec{\mathbf{1}} \quad (12)$$

$$\vec{\omega}^{(4)} = x_4\vec{\omega}^{(1)} + y_4\vec{\omega}^{(2)} + z_4\vec{\mathbf{1}} \quad (13)$$

where  $x_3 + x_4 = -1$ ,  $y_3 + y_4 = -1$ ,  $z_3 + z_4 = 1$ .

**Claim 6** *There exists  $i \in \{3, 4\}$  such that  $x_i + z_i \neq 0$ .*

**Proof:** If in the current setting  $\exists i \in \{3, 4\}$  s.t.  $x_i + z_i \neq 0$ , then the proof is done. If in the current setting  $x_3 + z_3 = x_4 + z_4 = 0$ , but  $\exists i \in \{3, 4\}$  s.t.  $y_i + z_i = 0$ , then we can switch the role of  $e_r$  and  $b_r$ , namely

$$\vec{\omega}^{(3)} = y_3\vec{\omega}^{(1)} + x_3\vec{\omega}^{(2)} + z_3\vec{\mathbf{1}}$$

$$\vec{\omega}^{(4)} = y_4\vec{\omega}^{(1)} + x_4\vec{\omega}^{(2)} + z_4\vec{\mathbf{1}}$$

Then the proof is done. If for all  $i \in \{3, 4\}$  we have  $x_i + z_i = 0$  and  $y_i + z_i = 0$ , then we switch the role of  $e_r$  and  $c_r$  and get

$$\vec{\omega}^{(3)} = \frac{1}{x_3}(\vec{\omega}^{(1)} - y_3\vec{\omega}^{(2)} - z_3\vec{\mathbf{1}})$$

$$\vec{\omega}^{(4)} = \frac{1}{x_4}(\vec{\omega}^{(1)} - y_4\vec{\omega}^{(2)} - z_4\vec{\mathbf{1}})$$

If  $\frac{1-z_3}{x_3} \neq 0$ , namely  $z_3 \neq 1$ , the proof is done. Suppose  $z_3 = 1$ , then  $x_3 = y_3 = -1$ . We have  $\vec{\omega}^{(3)} = 1 - \vec{\omega}^{(1)} - \vec{\omega}^{(2)}$ . Then  $\vec{\omega}^{(4)} = \vec{\mathbf{0}}$ , which is impossible. ■

Without loss of generality let  $x_3 + z_3 \neq 0$ . Similar to the previous proofs, we want to construct a matrix  $\mathbf{G}'$  using linear combinations of rows from  $\mathbf{F}_4^2$ . Let the first 3 rows for  $\mathbf{G}'$  to be  $\mathbf{G}$ . Then  $\text{rank}(\mathbf{G}') \geq 3$ . Since  $\text{rank}(\mathbf{F}_4^2) \leq 3$  and all rows in  $\mathbf{G}'$  are linear combinations of rows in  $\mathbf{F}_4^2$ , we have  $\text{rank}(\mathbf{G}') \leq 3$ . So  $\text{rank}(\mathbf{G}') = 3$ . This means that any linear combinations of rows in  $\mathbf{F}_4^2$  is linearly dependent of rows in  $\mathbf{G}$ .

Consider the moment where  $a_1$  is ranked at the top and  $a_2$  is ranked at the second position. Then  $[\frac{e_1 b_1}{1-e_1}, \frac{e_2 b_2}{1-e_2}, \frac{e_3 b_3}{1-e_3}, \frac{e_4 b_4}{1-e_4}]$  is linearly dependent of  $\mathbf{G}$ . Adding  $\vec{\omega}^{(2)}$  to it, we have

$$\vec{\theta}^{(eb)} = [\frac{b_1}{1-e_1}, \frac{b_2}{1-e_2}, \frac{b_3}{1-e_3}, \frac{b_4}{1-e_4}]$$

which is linearly dependent of  $\mathbf{G}$ .

Similarly consider the moment that  $a_1$  is ranked at the top and  $a_3$  is ranked at the second position. We obtain  $[\frac{e_1 c_1}{1-e_1}, \frac{e_2 c_2}{1-e_2}, \frac{e_3 c_3}{1-e_3}, \frac{e_4 c_4}{1-e_4}]$ . Add  $\vec{\omega}^{(3)}$  to it, we get

$$\vec{\theta}^{(ec)} = [\frac{c_1}{1-e_1}, \frac{c_2}{1-e_2}, \frac{c_3}{1-e_3}, \frac{c_4}{1-e_4}]$$

which is linearly dependent of  $\mathbf{G}$ .

Recall from (10)

$$\vec{\theta}^{(e)} = \left[ \frac{1}{1-e_1}, \frac{1}{1-e_2}, \frac{1}{1-e_3}, \frac{1}{1-e_4} \right]$$

Then

$$\begin{aligned} \vec{\theta}^{(ec)} &= \left[ \frac{x_3 e_1 + y_3 b_1 + z_3}{1-e_1}, \frac{x_3 e_2 + y_3 b_2 + z_3}{1-e_2}, \frac{x_3 e_3 + y_3 b_3 + z_3}{1-e_3}, \frac{x_3 e_4 + y_3 b_4 + z_3}{1-e_4} \right] \\ &= (x_3 + z_3) \vec{\theta}^{(e)} + y_3 \vec{\theta}^{(eb)} - x_3 \vec{1} \end{aligned}$$

Because both  $\vec{\theta}^{(eb)}$  and  $\vec{\theta}^{(ec)}$  are linearly dependent of  $\mathbf{G}$ ,  $\vec{\theta}^{(e)}$  is also linearly dependent of  $\mathbf{G}$ . Make it the 4th row of  $\mathbf{G}'$ . Suppose the rank of  $\mathbf{G}'$  is still 3. We will first prove this lemma under the assumption below, and then discuss the case where the assumption does not hold.

Assumption 1: Suppose  $\vec{1}, \vec{\omega}^{(1)}, \vec{\theta}^{(e)}$  are linearly independent.

Then  $\vec{\omega}^{(2)}$  is a linear combination of  $\vec{1}, \vec{\omega}^{(1)}$  and  $\vec{\theta}^{(e)}$ . We write  $\vec{\omega}^{(2)} = s_1 + s_2 \vec{\omega}^{(1)} + s_3 \vec{\theta}^{(e)}$  for some constants  $s_1, s_2, s_3$ . We have  $s_3 \neq 0$  because  $\vec{\omega}^{(2)}$  is linearly independent of  $\vec{1}$  and  $\vec{\omega}^{(1)}$ . Elementwise, for  $r = 1, 2, 3, 4$  we have

$$b_r = s_1 + s_2 e_r + \frac{s_3}{1-e_r} \quad (14)$$

Let

$$\mathbf{G}'' = \begin{bmatrix} \mathbf{G} \\ \vec{\theta}^{(eb)} \end{bmatrix}$$

$\vec{\theta}^{(eb)}$  is linearly dependent of  $\mathbf{G}$ . There exists a non-zero vector  $\vec{h} = [h_1, h_2, h_3, h_4]$  such that  $\vec{h} \cdot \mathbf{G}'' = 0$ . Namely  $h_1 \vec{1} + h_2 \vec{\omega}^{(1)} + h_3 \vec{\omega}^{(2)} + h_4 \vec{\theta}^{(eb)} = 0$ . Elementwise, for all  $r = 1, 2, 3, 4$

$$h_1 + h_2 e_r + h_3 b_r + h_4 \frac{b_r}{1-e_r} = 0 \quad (15)$$

where  $h_4 \neq 0$  because otherwise  $\text{rank}(\mathbf{G}) = 2$ . Substitute (14) into (15), and multiply both sides of it by  $(1-e_r)^2$ , we get

$$(h_1 + h_2 e_r + h_3 b_r)(1-e_r)^2 + h_4 (s_1 + s_2 e_r)(1-e_r) + h_4 s_3 = 0$$

Let

$$f(x) = (h_1 + h_2 e_r + h_3 b_r)(1-e_r)^2 + h_4 (s_1 + s_2 e_r)(1-e_r) + h_4 s_3$$

We claim that not all coefficients of  $x$  are zero, because  $f(1) = h_4 s_3 \neq 0$  ( $s_3 \neq 0$  and  $h_4 \neq 0$  by assumption). Then there are a maximum of 3 different roots, each of which uniquely determines  $b_r$  by (14). This means that there are at least two identical components. Namely  $\exists s \neq t$  s.t.  $\vec{\theta}^{(s)} = \vec{\theta}^{(t)}$ .

If Assumption 1 does not hold, namely  $\vec{\theta}^{(e)}$  is a linear combination of  $\vec{1}$  and  $\vec{\omega}^{(1)}$ , let

$$\frac{1}{1-e_r} = p_5 e_r + q_5 \quad (16)$$

Define

$$f(x) = \frac{1}{1-x} - p_5x - q_5$$

If  $f(x)$  has only 1 root or two identical roots between 0 and 1, then all columns of  $\mathbf{G}$  have identical  $e_r$ -s. This means  $\vec{\omega}^{(1)}$  is dependent of  $\vec{1}$ , which is a contradiction. So we only consider the situation where  $f(x)$  has two different roots between 0 and 1, denoted by  $u_1$  and  $u_2$  ( $u_1 \neq u_2$ ). Because  $e_1, e_2, e_3, e_4$  are roots of  $f(x)$ , there must be at least two identical  $e_r$ 's, with the value  $u_1$  or  $u_2$ .

Substitute (16) into  $\vec{\theta}^{(eb)}$ , we have  $\vec{\theta}^{(eb)} = [b_1(p_5e_1 + q_5), b_2(p_5e_2 + q_5), b_3(p_5e_3 + q_5), b_4(p_5e_4 + q_5)]$ , which is linearly dependent of  $\mathbf{G}$ . So there exists nonzero vector  $\vec{\gamma}_1 = [\gamma_{11}, \gamma_{12}, \gamma_{13}, \gamma_{14}]$  such that

$$\gamma_{11} + \gamma_{12}e_r + \gamma_{13}b_r + \gamma_{14}b_r(p_5e_r + q_5) = 0$$

From which we get

$$(\gamma_{13} + \gamma_{14}p_5e_r + \gamma_{14}q_5)b_r = -(\gamma_{11} + \gamma_{12}e_r) \quad (17)$$

We recall that  $e_r = u_1$  or  $e_r = u_2$  for  $r = 1, 2, 3, 4$ . Since  $u_1 \neq u_2$ , there exists  $i \in \{1, 2\}$  s.t.  $\gamma_{13} + \gamma_{14}p_5u_i + \gamma_{14}q_5 \neq 0$ . W.l.o.g. let it be  $u_1$ . If at least two of the  $e_r$ 's are  $u_1$ , without loss of generality let  $e_1 = e_2 = u_1$ . Then using (17) we know  $b_1 = b_2 = \frac{-(\gamma_{11} + \gamma_{12}u_1)}{(\gamma_{13} + \gamma_{14}p_5u_1 + \gamma_{14}q_5)}$ . From (12)(13) we can further obtain  $c_1 = c_2$  and  $d_1 = d_2$ . So  $\vec{\theta}^{(1)} = \vec{\theta}^{(2)}$ , which is a contradiction.

If there is only one of the  $e_r$ 's, which is  $u_1$ , w.l.o.g. let  $e_1 = u_1$  and  $e_2 = e_3 = e_4 = u_2$ . We consider the moment where  $a_2$  is ranked at the top and  $a_1$  the second, which is  $[\frac{e_1b_1}{1-b_1}, \frac{e_2b_2}{1-b_2}, \frac{e_3b_3}{1-b_3}, \frac{e_4b_4}{1-b_4}]$ . Add  $\vec{\omega}^{(1)}$  to it and we have  $\vec{\theta}^{(be)} = [\frac{e_1}{1-b_1}, \frac{e_2}{1-b_2}, \frac{e_3}{1-b_3}, \frac{e_4}{1-b_4}]$ , which is linearly dependent of  $\mathbf{G}$ . So there exists nonzero vector  $\vec{\gamma}_2 = [\gamma_{21}, \gamma_{22}, \gamma_{23}, \gamma_{24}]$  such that

$$\gamma_{21} + \gamma_{22}e_r + \gamma_{23}b_r + \gamma_{24}\frac{e_r}{1-b_r} = 0 \quad (18)$$

Let

$$f(x) = \gamma_{21} + \gamma_{22}u_2 + \gamma_{23}x + \gamma_{24}\frac{u_2}{1-x}$$

$$g(x) = (1-x)f(x) = (1-x)(\gamma_{21} + \gamma_{22}u_2 + \gamma_{23}x) + \gamma_{24}u_2$$

If any coefficient of  $g(x)$  is nonzero, then  $g(x)$  has at most 2 different roots. As  $g(x) = 0$  holds for  $b_2, b_3, b_4, \exists s \neq t$  s.t.  $b_s = b_t$ . Since  $e_s = e_t = u_2$ , from (12)(13) we know  $c_s = c_t$  and  $d_s = d_t$ . So  $\vec{\theta}^{(s)} = \vec{\theta}^{(t)}$ . Otherwise we have  $g(x) = f(x) = 0$  for all  $x$ . So

$$g(1) = \gamma_{24}u_2 = 0$$

Since  $0 < u_2 < 1$ , we have  $\gamma_{24} = 0$ . Substitute it into  $f(x)$  we have  $f(x) = \gamma_{21} + \gamma_{22}u_2 + \gamma_{23}x = 0$  holds for all  $x$ . So we have  $\gamma_{21} + \gamma_{22}u_2 = 0$  and  $\gamma_{23} = 0$ . Substitute  $\gamma_{23} = \gamma_{24} = 0$  into (18) we get  $\gamma_{21} + \gamma_{22}e_r = 0$ , which holds for both  $e_r = u_1$  and  $e_r = u_2$ . As  $u_1 \neq u_2$ , we have  $\gamma_{22} = 0$ . Then we have  $\gamma_{21} = 0$ . This contradicts the nonzero requirement of  $\vec{\gamma}_2$ . So there exists  $s \neq t$  s.t.  $\vec{\theta}^{(s)} = \vec{\theta}^{(t)}$ , which is a contradiction. ■

**Lemma 3** Given a random utility model  $\mathcal{M}(\vec{\theta})$  over a set of  $m$  alternatives  $\mathcal{A}$ , let  $\mathcal{A}_1, \mathcal{A}_2$  be two non-overlapping subsets of  $\mathcal{A}$ , namely  $\mathcal{A}_1, \mathcal{A}_2 \subset \mathcal{A}$  and  $\mathcal{A}_1 \cap \mathcal{A}_2 = \emptyset$ . Let  $V_1, V_2$  be rankings over  $\mathcal{A}_1$  and  $\mathcal{A}_2$ , respectively, then we have  $\Pr(V_1, V_2 | \vec{\theta}) = \Pr(V_1 | \vec{\theta}) \Pr(V_2 | \vec{\theta})$ .

**Proof:** In an RUM, given a ground truth utility  $\vec{\theta} = [\theta_1, \theta_2, \dots, \theta_m]$  and a distribution  $\mu_i(\cdot | \theta_i)$  for each alternative, an agent samples a random utility  $X_i$  for each alternative independently with probability density function  $\mu_i(\cdot | \theta_i)$ . The probability of the ranking  $a_{i_1} \succ a_{i_2} \succ \dots \succ a_{i_m}$  is

$$\begin{aligned} \Pr(a_{i_1} \succ \dots \succ a_{i_m} | \vec{\theta}) &= \Pr(X_{i_1} > X_{i_2} > \dots > X_{i_m}) \\ &= \int_{-\infty}^{\infty} \int_{x_{i_m}}^{\infty} \dots \int_{x_{i_2}}^{\infty} \mu_{i_m}(x_{i_m}) \mu_{i_{m-1}}(x_{i_{m-1}}) \dots \mu_{i_1}(x_{i_1}) dx_{i_1} dx_{i_2} \dots dx_{i_m} \end{aligned}$$

W.l.o.g. we let  $i_1 = 1, \dots, i_m = m$ . Let  $\mathcal{S}_{X_1 > X_2 > \dots > X_m}$  denote the subspace of  $\mathbb{R}^m$  where  $X_1 > X_2 > \dots > X_m$  and let  $\mu(\vec{x} | \vec{\theta})$  denote  $\mu_m(x_m) \mu_{m-1}(x_{m-1}) \dots \mu_1(x_1)$ . Thus we have

$$\Pr(a_1 \succ \dots \succ a_m | \vec{\theta}) = \int_{\mathcal{S}_{X_1 > X_2 > \dots > X_m}} \mu(\vec{x} | \vec{\theta}) d\vec{x}$$

We first prove the following claim.

**Claim 7** Given a random utility model  $\mathcal{M}(\vec{\theta})$ , for any parameter  $\vec{\theta}$  and any  $\mathcal{A}_s \subseteq \mathcal{A}$ , we let  $\vec{\theta}_s$  denote the components of  $\vec{\theta}$  for alternatives in  $\mathcal{A}_s$ , and let  $V_s$  be a full ranking over  $\mathcal{A}_s$  (which is a partial ranking over  $\mathcal{A}$ ). Then we have  $\Pr(V_s | \vec{\theta}) = \Pr(V_s | \vec{\theta}_s)$ .

**Proof:** Let  $m_s$  be the number of alternatives in  $\mathcal{A}_s$ . Let  $\mathcal{S}_{X_1 > X_2 > \dots > X_{m_s}}$  denote the subspace of  $\mathbb{R}^{m_s}$  where  $X_1 > X_2 > \dots > X_{m_s}$ . W.l.o.g. let  $V_s$  be  $a_1 \succ a_2 \dots \succ a_{m_s}$ . Then we have

$$\begin{aligned} \Pr(V_s | \vec{\theta}) &= \int_{\mathcal{S}_{X_1 > X_2 > \dots > X_{m_s}} \times \mathbb{R}^{m-m_s}} \mu(\vec{x} | \vec{\theta}) d\vec{x} \\ &= \int_{-\infty}^{\infty} \int_{x_{m_s}}^{\infty} \dots \int_{x_2}^{\infty} \int_{-\infty}^{\infty} \dots \int_{-\infty}^{\infty} \mu_{m_s}(x_{m_s}) \dots \mu_1(x_1) dx_{m_s+1} \dots dx_m dx_1 \dots dx_{m_s} \\ &= \int_{-\infty}^{\infty} \int_{x_{m_s}}^{\infty} \dots \int_{x_2}^{\infty} \mu_{m_s}(x_{m_s}) \mu_{m_s-1}(x_{m_s-1}) \dots \mu_1(x_1) dx_1 dx_2 \dots dx_{m_s} \\ &= \int_{\mathcal{S}_{X_1 > X_2 > \dots > X_{m_s}}} \mu(\vec{x}_s | \vec{\theta}_s) d\vec{x}_s = \Pr(V_s | \vec{\theta}_s) \end{aligned}$$

■

Let  $\mathcal{A}_1 = \{a_{11}, a_{12}, \dots, a_{1m_1}\}$  and  $\mathcal{A}_2 = \{a_{21}, a_{22}, \dots, a_{2m_2}\}$ . Without loss of generality we let  $V_1$  and  $V_2$  be  $a_{11} \succ a_{12} \succ \dots \succ a_{1m_1}$  and  $a_{21} \succ a_{22} \succ \dots \succ a_{2m_2}$  respectively. For any  $\vec{\theta}$ , let  $\vec{\theta}_1$  denote the subvector of  $\vec{\theta}$  on  $\mathcal{A}_1$ . Let  $\mathcal{S}_1$  denote  $\mathcal{S}_{X_{11} > X_{12} > \dots > X_{1m_1}}$ .  $\vec{\theta}_2$  and  $\mathcal{S}_2$  are defined similarly. According to Claim 7,

we have  $\Pr(V_1|\vec{\theta}) = \Pr(V_1|\vec{\theta}_1) = \int_{\mathcal{S}_1} \mu(\vec{x}_1|\vec{\theta}_1)d\vec{x}_1$  and  $\Pr(V_2|\vec{\theta}) = \Pr(V_2|\vec{\theta}_2) = \int_{\mathcal{S}_2} \mu(\vec{x}_2|\vec{\theta}_2)d\vec{x}_2$ . Then we have

$$\begin{aligned}
\Pr(V_1, V_2|\vec{\theta}) &= \int_{\mathcal{S}_1 \times \mathcal{S}_2 \times \mathbb{R}^{m-m_1-m_2}} \mu(\vec{x}|\vec{\theta})d\vec{x} \\
&= \int_{\mathcal{S}_1 \times \mathcal{S}_2} \mu(\vec{x}_1, \vec{x}_2|\vec{\theta}_1, \vec{\theta}_2)d\vec{x} && \text{(Claim 7)} \\
&= \int_{\mathcal{S}_1} \int_{\mathcal{S}_2} \mu(\vec{x}_1|\vec{\theta}_1)\mu(\vec{x}_2|\vec{\theta}_2)d\vec{x}_1d\vec{x}_2 && \text{(Fubini's Theorem)} \\
&= \int_{\mathcal{S}_1} \mu(\vec{x}_1|\vec{\theta}_1)d\vec{x}_1 \int_{\mathcal{S}_2} \mu(\vec{x}_2|\vec{\theta}_2)d\vec{x}_2 \\
&= \Pr(V_1|\vec{\theta}_1) \Pr(V_2|\vec{\theta}_2)
\end{aligned}$$

■

**Theorem 4** *Algorithm 1 is consistent w.r.t. 2-PL, where there exists  $\epsilon > 0$  such that each parameter is in  $[\epsilon, 1]$ .*

**Proof:** We will check all assumptions in Theorem 3.1 in ?.

Assumption 3.1: **Strict Stationarity:** the  $(n \times 1)$  random vectors  $\{v_t; -\infty < t < \infty\}$  form a strictly stationary process with sample space  $\mathcal{S} \subseteq \mathbb{R}^n$ .

As the data are generated i.i.d., the process is strict stationary.

Assumption 3.2: **Regularity Conditions for  $g(\cdot, \cdot)$ :** the function  $g : \mathcal{S} \times \Theta \rightarrow \mathbb{R}^q$  where  $q < \infty$ , satisfies: (i) it is continuous on  $\Theta$  for each  $P \in \mathcal{S}$ ; (ii)  $E[g(P, \vec{\theta})]$  exists and is finite for every  $\theta \in \Theta$ ; (iii)  $E[g(P, \vec{\theta})]$  is continuous on  $\Theta$ .

Our moment conditions satisfy all the regularity conditions since  $g(P, \vec{\theta})$  is continuous on  $\Theta$  and bounded in  $[-1, 1]^9$ .

Assumption 3.3: **Population Moment Condition.** The random vector  $v_t$  and the parameter vector  $\theta_0$  satisfy the  $(q \times 1)$  population moment condition:  $E[g(P, \theta_0)] = 0$ .

This assumption holds by the definition of our GMM.

Assumption 3.4 **Global Identification.**  $E[g(P, \vec{\theta}')] \neq 0$  for all  $\vec{\theta}' \in \Theta$  such that  $\vec{\theta}' \neq \theta_0$ .

This is proved in Theorem 2.

Assumption 3.7 **Properties of the Weighting Matrix.**  $W_t$  is a positive semi-definite matrix which converges in probability to the positive definite matrix of constants  $W$ .

This holds because  $W = I$ .

Assumption 3.8 **Ergodicity.** The random process  $\{v_t; -\infty < t < \infty\}$  is ergodic.

Since the data are generated i.i.d., the process is ergodic.

Assumption 3.9 **Compactness of  $\Theta$ .**  $\Theta$  is a compact set.

$\Theta = [\epsilon, 1]^9$  is compact.

Assumption 3.10 **Domination of  $g(P, \vec{\theta})$ .**  $E[\sup_{\theta \in \Theta} ||g(P, \vec{\theta})||] < \infty$ .

This assumption holds because all moment conditions are finite.

**Theorem 3.1 Consistency of the Parameter Estimator.** If Assumptions 3.1-3.4 and 3.7-3.10 hold then  $\hat{\theta}_T \xrightarrow{P} \theta_0$

■
